# Supplementary material for: Association between Serum Selenium Level and the Presence of Diabetes Mellitus: A Meta-Analysis of Observational Studies
Source: PubMed Central journal article supplement — Diabetes Metab J. 2019 Jan 2;43(4):447–60. doi: 10.4093/dmj.2018.0123 (PMC6712224; doi:10.4093/dmj.2018.0123), 2019-01-02
Supplement: dmj-43-447-s002.pdf [file dmj-43-447-s002.pdf]

**Supplementary Table 2.** Quality assessment of included studies

| Study                           | Adequate case definition | Representativeness of the cases | Selection of controls | Definition of controls | Comparability | Ascertainment of exposure | Same method of ascertainment for cases and controls | Non-response rate | Total |
|---------------------------------|--------------------------|---------------------------------|-----------------------|------------------------|---------------|---------------------------|-----------------------------------------------------|-------------------|-------|
| Yuan et al. (2018) [24]         | *                        | *                               | *                     | *                      | **            | *                         | *                                                   |                   | 8     |
| Kohler et al. (2018) [18]       | *                        | *                               | *                     | *                      | **            | *                         | *                                                   |                   | 8     |
| Li et al. (2017) [19]           | *                        | *                               | *                     | *                      | **            | *                         | *                                                   |                   | 8     |
| Galan-Chilet et al. (2017) [25] | *                        | *                               | *                     | *                      | **            | *                         | *                                                   |                   | 8     |
| Su et al. (2016) [33]           | *                        | *                               | *                     | *                      | **            | *                         | *                                                   |                   | 8     |
| Hansen et al. (2017) [22]       | *                        | *                               | *                     | *                      | **            | *                         | *                                                   |                   | 8     |
| Zhang et al. (2017) [27]        | *                        | *                               | *                     | *                      | **            | *                         | *                                                   |                   | 8     |
| Skalnaya et al. (2017) [28]     | *                        | *                               | *                     | *                      | **            | *                         | *                                                   |                   | 8     |
| Lu et al. (2016) [29]           | *                        |                                 |                       | *                      | **            | *                         | *                                                   |                   | 6     |
| Liu et al. (2016) [35]          | *                        |                                 |                       | *                      | **            | *                         | *                                                   |                   | 6     |
| Feng et al. (2015) [36]         | *                        | *                               | *                     | *                      | **            | *                         | *                                                   |                   | 8     |
| Wei et al. (2015) [37]          | *                        | *                               | *                     | *                      | **            | *                         | *                                                   |                   | 8     |
| Alehagen et al. (2016) [30]     | *                        | *                               | *                     | *                      |               | *                         | *                                                   |                   | 6     |
| Vinceti et al. (2015) [34]      | *                        | *                               | *                     | *                      | **            | *                         | *                                                   |                   | 8     |
| Gao et al. (2014) [23]          | *                        | *                               | *                     | *                      | **            | *                         | *                                                   |                   | 8     |
| Park et al. (2012) [21]         | *                        | *                               | *                     | *                      | **            | *                         | *                                                   |                   | 8     |
| Stranges et al. (2011) [31]     | *                        | *                               | *                     | *                      |               | *                         | *                                                   |                   | 6     |
| Stranges et al. (2010) [39]     |                          | *                               | *                     |                        | **            | *                         | *                                                   |                   | 6     |
| Laclaustra et al. (2009) [20]   | *                        | *                               | *                     | *                      | **            | *                         | *                                                   |                   | 8     |
| Bleys et al. (2007) [32]        | *                        | *                               | *                     | *                      | **            | *                         | *                                                   |                   | 8     |
