# Supplementary material for: Association between Serum Selenium Level and the Presence of Diabetes Mellitus: A Meta-Analysis of Observational Studies
Source: PubMed Central journal article supplement — Diabetes Metab J. 2019 Jan 2;43(4):447–60. doi: 10.4093/dmj.2018.0123 (PMC6712224; doi:10.4093/dmj.2018.0123), 2019-01-02
Supplement: dmj-43-447-s003.pdf [file dmj-43-447-s003.pdf]

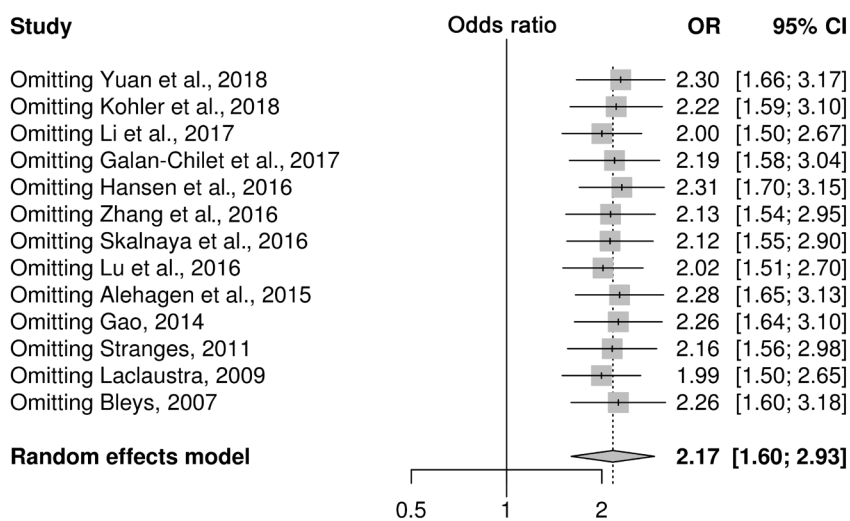

**Supplementary Fig. 1.** Sensitivity analysis of the meta-analysis of studies comparing odds ratio (OR) of diabetes mellitus between the high and low selenium groups. CI, confidence interval.
