# Supplementary figures and images for: Association between Serum Selenium Level and the Presence of Diabetes Mellitus: A Meta-Analysis of Observational Studies
Source: PubMed Central journal article supplement — Diabetes Metab J. 2019 Jan 2;43(4):447–60. doi: 10.4093/dmj.2018.0123 (PMC6712224; doi:10.4093/dmj.2018.0123), 2019-01-02

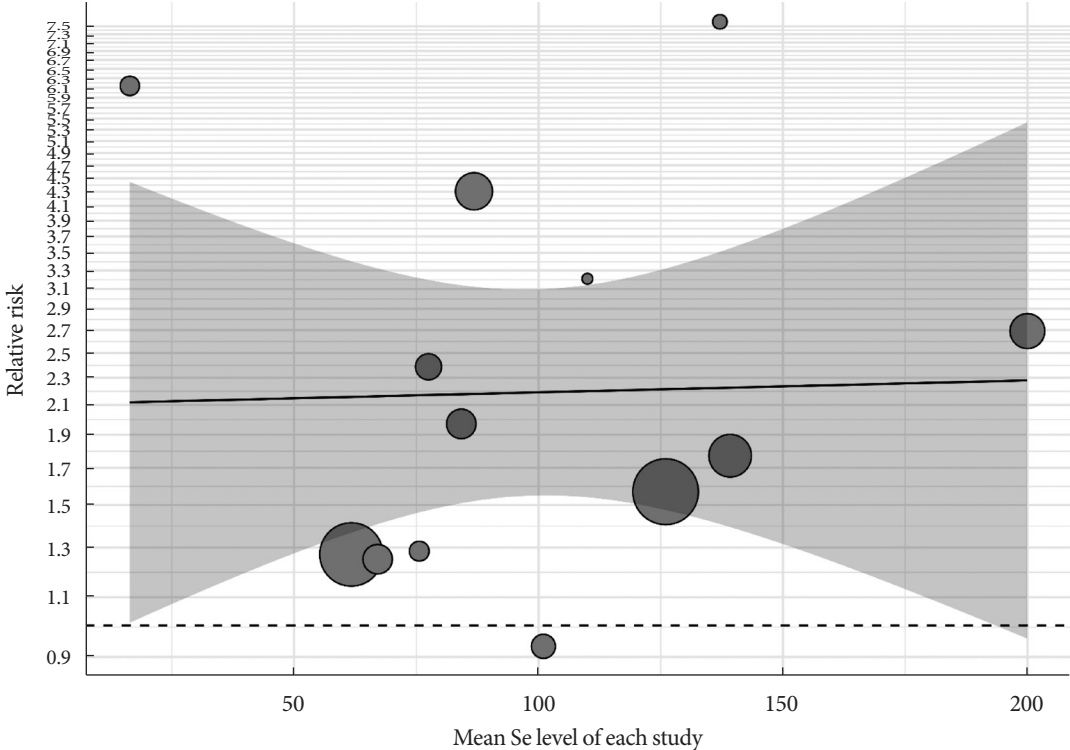

Supplementary Fig. 3. Meta-regression analysis based on the mean selenium (Se) level for each study.

Supplement: dmj-43-447-s005.pdf [file dmj-43-447-s005.pdf]
